# Supplementary material
Source: PubMed Central journal article supplement (PMC3960337)
Supplement: NIHMS537256-supplement-01.pdf [file NIHMS537256-supplement-01.pdf]

**ONLINE REPOSITORY****Transcutaneous yellow fever vaccination of subjects with or without atopic dermatitis**

Mark K. Slifka<sup>1,6</sup>, Ph.D., Donald Y. M. Leung<sup>5</sup>, M.D. Ph.D., Erika Hammarlund<sup>1</sup>, M.S., Hans-Peter Raué<sup>1</sup>, Ph.D., Eric L. Simpson<sup>2</sup>, M.D. M.C.R., Susan Tofte<sup>2</sup>, F.N.P., Shahana Baig-Lewis<sup>2</sup>, M.P.H., Gloria David<sup>3</sup>, Ph.D., Henry Lynn<sup>3</sup>, Ph.D., Rob Woolson<sup>3</sup>, M.S. J.D., Tissa Hata<sup>4</sup>, M.D., Henry Milgrom<sup>5</sup>, M.D., Jon Hanifin<sup>2</sup>, M.D.

**Table E1.** Baseline Total IgE, NT50, and day 30 IFN $\gamma$ +TNF $\alpha$ +CD4+/106 CD4+, IFN $\gamma$ +TNF $\alpha$ +CD8+/106 CD8+ counts. Geometric mean counts for each diagnostic group by route are listed in red. N.D. denotes Not Determined.

*Figure legends*

**Figure E1.** Vaccine-induced IFN $\gamma$ + YFV-specific CD4+ and CD8+ T cell responses. The kinetics and magnitude of YFV-specific CD4+ T cells (A and B) or CD8+ T cells (C and D) were measured in subjects vaccinated by the subcutaneous route (A and C) or the transcutaneous route (B and D). The frequency of virus-specific T cells was measured by stimulating PBMC with purified YFV and measuring the frequency of total IFN $\gamma$ + T cells. Error bars represent 95% confidence intervals. Numbers at bottom of each panel denote *p* values of the comparisons between AD and NA at days 7, 14, and 30.

**Figure E2.** Effect of vaccination route on YFV-specific CD4+ and CD8+ T cell responses. The kinetics and magnitude of YFV-specific CD4+ T cells (A) or CD8+ T cells (B) were measured in subjects vaccinated by the subcutaneous (SC) and transcutaneous (TC) routes. The frequency of virus-specific T cells was measured by stimulating PBMC with purified YFV and measuring the frequency of total IFN $\gamma$ +TNF $\alpha$ +. Numbers at bottom of each panel denote *p* values of the comparisons between SC and TC for AD (red) and NA (blue) subjects at days 14 and 30.

Slifka *et al.* Online Repository**Figure E1. Vaccine-induced IFN $\gamma$ <sup>+</sup> YFV-specific CD4<sup>+</sup> and CD8<sup>+</sup> T cell responses.**

The kinetics and magnitude of YFV-specific CD4<sup>+</sup> T cells (A and B) or CD8<sup>+</sup> T cells (C and D) were measured in subjects vaccinated by the subcutaneous route (A and C) or the transcutaneous route (B and D). The frequency of virus-specific T cells was measured by stimulating PBMC with purified YFV and measuring the frequency of total IFN $\gamma$ <sup>+</sup> T cells. Error bars represent 95% confidence intervals.

Numbers at bottom of each panel denote *p* values of the comparisons between AD and NA at days 7, 14, and 30.

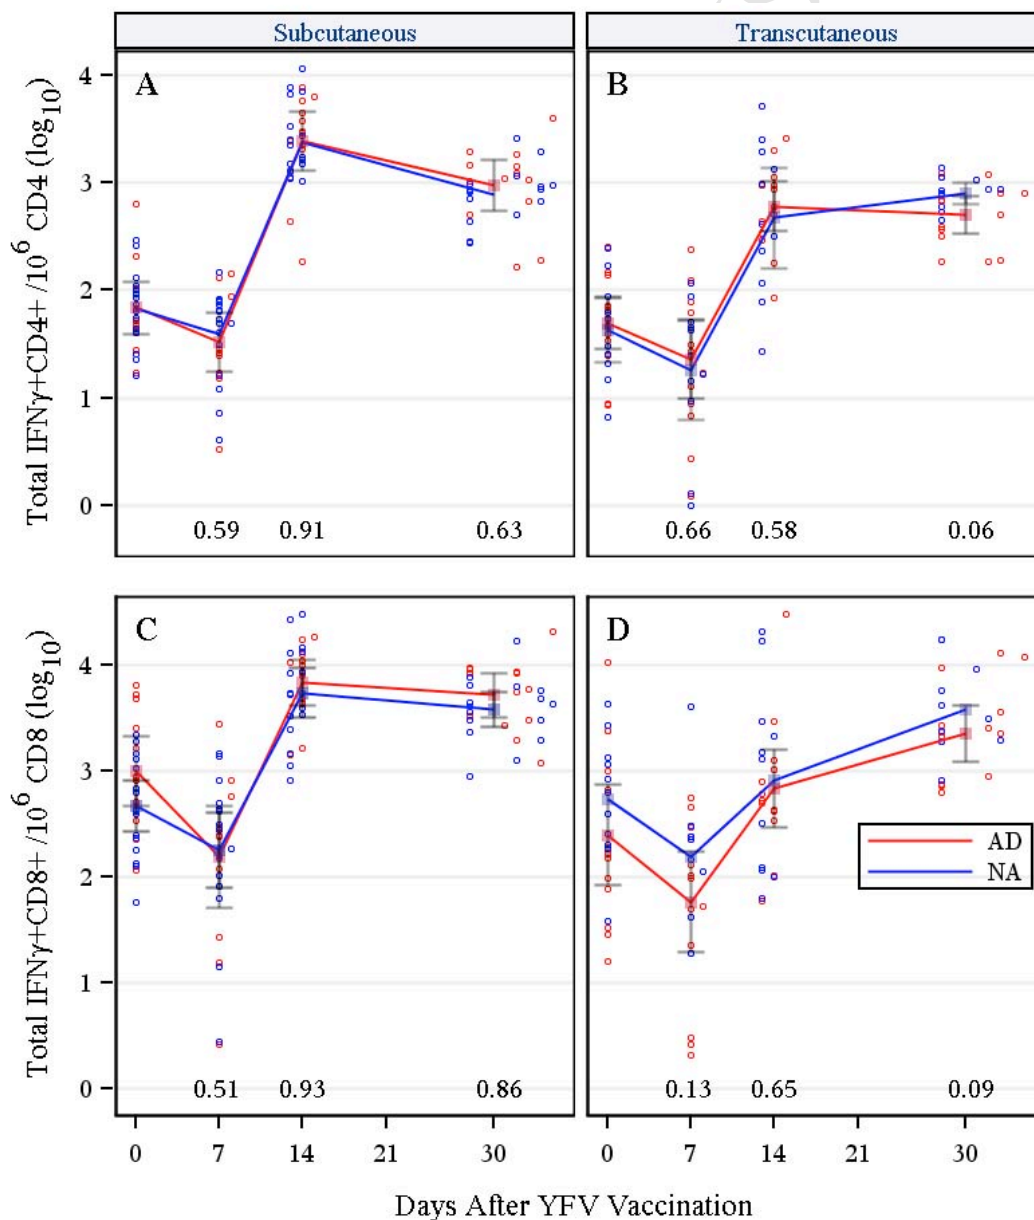

**Figure E2. Effect of vaccination route on YFV-specific CD4<sup>+</sup> and CD8<sup>+</sup> T cell responses.**

The kinetics and magnitude of YFV-specific CD4<sup>+</sup> T cells (A) or CD8<sup>+</sup> T cells (B) were measured in subjects vaccinated by the subcutaneous (SC) and transcutaneous (TC) routes. The frequency of virus-specific T cells was measured by stimulating PBMC with purified YFV and measuring the frequency of total IFN $\gamma$ <sup>+</sup>TNF $\alpha$ <sup>+</sup>. Numbers at bottom of each panel denote *p* values of the comparisons between SC and TC for AD (red) and NA (blue) subjects at days 14 and 30.

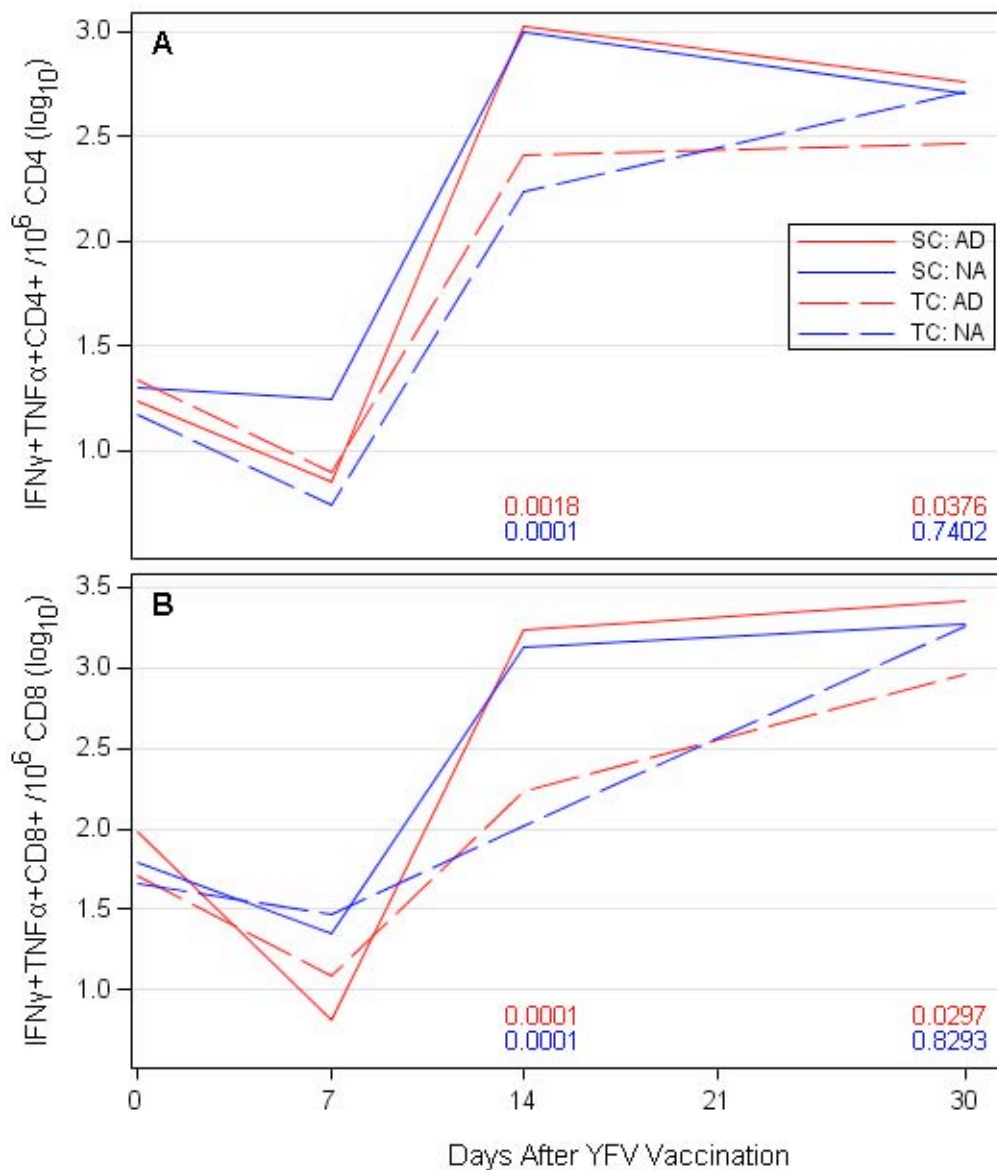

**Table E1. Baseline Total IgE, NT<sub>50</sub>, and day 30 IFN $\gamma$ <sup>+</sup>TNF $\alpha$ <sup>+</sup>CD4<sup>+</sup>/10<sup>6</sup> CD4<sup>+</sup>,**

**IFN $\gamma$ <sup>+</sup>TNF $\alpha$ <sup>+</sup>CD8<sup>+</sup>/10<sup>6</sup> CD8<sup>+</sup> counts.** Geometric mean counts for each diagnostic group by route are listed in red. N.D. denotes Not Determined.

| Subject | Route | Diagnostic Group | Total IgE  | NT <sub>50</sub> | IFN $\gamma$ <sup>+</sup> TNF $\alpha$ <sup>+</sup> CD4 <sup>+</sup> | IFN $\gamma$ <sup>+</sup> TNF $\alpha$ <sup>+</sup> CD8 <sup>+</sup> |
|---------|-------|------------------|------------|------------------|----------------------------------------------------------------------|----------------------------------------------------------------------|
|         |       |                  |            |                  | / 10 <sup>6</sup> CD4 <sup>+</sup>                                   | / 10 <sup>6</sup> CD8 <sup>+</sup>                                   |
| 1       | SC    | AD               | 11         | 9894             | 372                                                                  | 1788                                                                 |
| 2       |       |                  | 14         | 3161             | 42                                                                   | 396                                                                  |
| 3       |       |                  | 19         | 6437             | 1354                                                                 | 3900                                                                 |
| 4       |       |                  | 23         | 49703            | 753                                                                  | 1399                                                                 |
| 5       |       |                  | 31         | 2411             | 421                                                                  | 3035                                                                 |
| 6       |       |                  | 37         | 9419             | 1233                                                                 | 4267                                                                 |
| 7       |       |                  | 78         | 1858             | 1189                                                                 | 5886                                                                 |
| 8       |       |                  | 86         | 1369             | 1023                                                                 | 3938                                                                 |
| 9       |       |                  | 120        | 2788             | 826                                                                  | 2162                                                                 |
| 10      |       |                  | 181        | 2263             | 747                                                                  | 4449                                                                 |
| 11      |       |                  | 295        | 4060             | 1035                                                                 | 4759                                                                 |
| 12      |       |                  | 610        | 7516             | 777                                                                  | 4872                                                                 |
| 13      |       |                  | 695        | 1257             | N.D.                                                                 | N.D.                                                                 |
| 14      |       |                  | 14160      | 1931             | 130                                                                  | 958                                                                  |
|         |       |                  | <b>105</b> | <b>4002</b>      | <b>569</b>                                                           | <b>2600</b>                                                          |
| 15      |       | NA               | 3          | 5283             | 723                                                                  | 3871                                                                 |
| 16      |       |                  | 3          | 3200             | 1438                                                                 | 7333                                                                 |
| 17      |       |                  | 5          | 1836             | 1435                                                                 | 3518                                                                 |
| 18      |       |                  | 6          | 3039             | 563                                                                  | 2625                                                                 |
| 19      |       |                  | 7          | 5889             | 651                                                                  | 3025                                                                 |
| 20      |       |                  | 9          | 13873            | 179                                                                  | 2972                                                                 |
| 21      |       |                  | 10         | 1845             | 181                                                                  | 111                                                                  |
| 22      |       |                  | 11         | 1529             | N.D.                                                                 | N.D.                                                                 |
| 23      |       |                  | 12         | 3205             | 412                                                                  | 2102                                                                 |
| 24      |       |                  | 14         | 5734             | 362                                                                  | 1751                                                                 |
| 25      |       |                  | 16         | 1250             | N.D.                                                                 | N.D.                                                                 |
| 26      |       |                  | 17         | 5177             | 630                                                                  | 3681                                                                 |
| 27      |       |                  | 23         | 4445             | 451                                                                  | 479                                                                  |
| 28      |       |                  | 40         | 822              | 536                                                                  | 1757                                                                 |
| 29      |       |                  | 40         | 4096             | 611                                                                  | 1232                                                                 |
| 30      |       |                  | 70         | 7758             | 283                                                                  | 4425                                                                 |
| 31      |       |                  | 85         | 6422             | N.D.                                                                 | N.D.                                                                 |
| 32      |       |                  | 102        | 10127            | 618                                                                  | 2389                                                                 |
| 33      |       |                  | 104        | 1448             | N.D.                                                                 | N.D.                                                                 |
| 34      |       |                  | 133        | 2757             | 377                                                                  | 588                                                                  |
|         |       |                  | <b>19</b>  | <b>3504</b>      | <b>502</b>                                                           | <b>1873</b>                                                          |

| <i>Subject</i> | <i>Route</i> | <i>Diagnostic Group</i> | <i>Total IgE</i> | <i>NT<sub>50</sub></i> | <i>IFN<math>\gamma</math><sup>+</sup>TNF<math>\alpha</math><sup>+</sup>CD4<sup>+</sup> / 10<sup>6</sup> CD4<sup>+</sup></i> | <i>IFN<math>\gamma</math><sup>+</sup>TNF<math>\alpha</math><sup>+</sup>CD8<sup>+</sup> / 10<sup>6</sup> CD8<sup>+</sup></i> |
|----------------|--------------|-------------------------|------------------|------------------------|-----------------------------------------------------------------------------------------------------------------------------|-----------------------------------------------------------------------------------------------------------------------------|
| 35             | TC           | AD                      | 16               | 7659                   | N.D.                                                                                                                        | N.D.                                                                                                                        |
| 36             |              |                         | 33               | 19297                  | N.D.                                                                                                                        | N.D.                                                                                                                        |
| 37             |              |                         | 40               | 5360                   | 220                                                                                                                         | 189                                                                                                                         |
| 38             |              |                         | 41               | 4483                   | 397                                                                                                                         | 1385                                                                                                                        |
| 39             |              |                         | 57               | 12406                  | 653                                                                                                                         | 1142                                                                                                                        |
| 40             |              |                         | 89               | 1664                   | 191                                                                                                                         | 359                                                                                                                         |
| 41             |              |                         | 172              | 4378                   | 374                                                                                                                         | 6193                                                                                                                        |
| 42             |              |                         | 174              | 2729                   | 474                                                                                                                         | 761                                                                                                                         |
| 43             |              |                         | 267              | 5267                   | 407                                                                                                                         | 2541                                                                                                                        |
| 44             |              |                         | 367              | 2985                   | N.D.                                                                                                                        | N.D.                                                                                                                        |
| 45             |              |                         | 701              | 2762                   | 320                                                                                                                         | 542                                                                                                                         |
| 46             |              |                         | 1260             | 6464                   | 103                                                                                                                         | 484                                                                                                                         |
| 47             |              |                         | 1463             | 467                    | 158                                                                                                                         | 194                                                                                                                         |
| 48             |              |                         | 1662             | 550                    | N.D.                                                                                                                        | N.D.                                                                                                                        |
| 49             |              |                         | 2473             | 2718                   | 749                                                                                                                         | 1527                                                                                                                        |
| 50             |              |                         | 3133             | 3660                   | 426                                                                                                                         | 5607                                                                                                                        |
| 51             |              |                         | 5480             | 6207                   | 130                                                                                                                         | 2781                                                                                                                        |
| 52             |              |                         | 37340            | 1881                   | 162                                                                                                                         | 220                                                                                                                         |
|                |              |                         | <b>391</b>       | <b>3532</b>            | <b>288</b>                                                                                                                  | <b>926</b>                                                                                                                  |
|                |              |                         |                  |                        | N.D.                                                                                                                        | N.D.                                                                                                                        |
| 53             |              | NA                      | 2                | 6196                   | 702                                                                                                                         | 10651                                                                                                                       |
| 54             |              |                         | 4                | 9283                   | 531                                                                                                                         | 1230                                                                                                                        |
| 55             |              |                         | 6                | 8564                   | N.D.                                                                                                                        | N.D.                                                                                                                        |
| 56             |              |                         | 7                | 16854                  | 245                                                                                                                         | 369                                                                                                                         |
| 57             |              |                         | 15               | 2474                   | 955                                                                                                                         | 9353                                                                                                                        |
| 58             |              |                         | 21               | 7242                   | 305                                                                                                                         | 3135                                                                                                                        |
| 59             |              |                         | 28               | 16010                  | 760                                                                                                                         | 3680                                                                                                                        |
| 60             |              |                         | 36               | 9816                   | 333                                                                                                                         | 2689                                                                                                                        |
| 61             |              |                         | 39               | 5214                   | 587                                                                                                                         | 1894                                                                                                                        |
| 62             |              |                         | 51               | 4609                   | 588                                                                                                                         | 515                                                                                                                         |
| 63             |              |                         | 58               | 2330                   | N.D.                                                                                                                        | N.D.                                                                                                                        |
| 64             |              |                         | 158              | 4051                   | N.D.                                                                                                                        | N.D.                                                                                                                        |
| 65             |              |                         | 294              | 5835                   | 519                                                                                                                         | 696                                                                                                                         |
| 66             |              |                         | 396              | 1733                   | 578                                                                                                                         | 853                                                                                                                         |
|                |              |                         | <b>29</b>        | <b>5840</b>            | <b>516</b>                                                                                                                  | <b>1839</b>                                                                                                                 |
